# Supplementary material for: Research data sharing in the Australian national science agency: Understanding the relative importance of organisational, disciplinary and domain-specific influences
Source: PLoS One. 2020 Aug 28;15(8):e0238071. doi: 10.1371/journal.pone.0238071 (PMC7454993; doi:10.1371/journal.pone.0238071)
Supplement: S2 File — (XLSX) [file pone.0238071.s002.xlsx]

## Sheet: domain_aggregation
	sect_new	instinhib_s	contrinhib_s	share_s	sect_sz
1	Environment - private	2.82353	4.29412	3.4375	17
2	Healthcare - private	4.03846	5.57143	3.32639	28
3	Manufacturing - private	3.32292	5.54545	3.31111	33
4	Natural Resources - private	3.16981	5.16667	3.13605	57
5	Primary Industry - private	3.14554	4.31757	3.39844	77
6	Science - private	2.91667	4.16667	3.71014	24
7	Environment - public	2.56272	3.41919	3.97079	100
8	Healthcare - public	4.47917	4.71875	2.98889	16
9	Natural Resources - public	3.06667	4.36735	3.89394	49
10	Primary Industry - public	3.43137	3.89623	3.40942	55
11	Science - public	2.52846	3.57955	3.75676	44

## Sheet: Data dictionary
ShortName	Description - (question number and description)	User entered/calculated	Value type: nominal (drop down selection) or ordinal (e.g. likert), numeric value	Likert scale	Labels
IndusvGov	Question 82 - Do you work primarily with:	User entered	Nominal	Nominal	1 = Industry 2 = Government
sect_r	Question 83 - In which area do you primarily conduct your research?	Calculated based on user entry and compression of list	Nominal	Nominal	1 = Environment (including Climate and Weather) 2 = Health Care (including Biotechnology) 3 = Manufacturing 4 = Natural Resources - Water, Natural Resources - Energy, Natural Resources - Minerals, or Natural Resources - Other 5 = Primary Industries - Agriculture & Forestry, Primary Industries - Marine, or Primary Industries - Other 6 = Science - Astronomical, Science - Atomic, Science - Nuclear, …	Re-coded to single out popular sectors and combine natural resources, primary industries, and science sub-groups together.
instinhib	inhibit1+ inhibit2 + inhibit3	Calculated based on the mean of multiple items	Likert	7	1 = Not at all 2 =Rarely 3 = Occasionally 4 = Sometimes 5 = Frequently 6 = Usually 7 = A great deal
inhibit1	Question 84 - Within this area, how much do each of the following factors inhibit your ability to share data? Ethical restrictions	User entered	Likert	7	1 = Not at all 2 =Rarely 3 = Occasionally 4 = Sometimes 5 = Frequently 6 = Usually 7 = A great deal
inhibit2	Question 84 - Within this area, how much do each of the following factors inhibit your ability to share data? Privacy requirements	User entered	Likert	7	As above
inhibit3	Question 84 - Within this area, how much do each of the following factors inhibit your ability to share data? Other legislation, regulation and policy (e.g., anti-trust concerns)	User entered	Likert	7	As above
contrinhib	inhibit4 + inhibit5	Calculated based on the mean of multiple items	Likert	7	As above
inhibit4	Question 84 - Within this area, how much do each of the following factors inhibit your ability to share data? Contractual conditions i.e., the terms of the contract under which the data were generated or used	User entered	Likert	7	As above
inhibit5	Question 84 - Within this area, how much do each of the following factors inhibit your ability to share data? Constraints imposed by the ownership or licensing arrangements of third party data	User entered	Likert	7	As above
share	whoshare6 + whoshare7 + whoshare5 + whoshare3 + whoshare2 + whoshare9	Calculated based on the mean of multiple items	Likert	5	1 = Extremely unlikely 2 = Unlikely 3 = Neutral 4 = Likely 5 = Extremely likely
whoshare2	Question 93 - In the next 12 months, how likely is it that you will share data from one of your research projects with: Colleagues in my business unit	User entered	Likert	5	As above
whoshare3	Question 93 - In the next 12 months, how likely is it that you will share data from one of your research projects with: Colleagues in other business units	User entered	Likert	5	As above
whoshare5	Question 93 - In the next 12 months, how likely is it that you will share data from one of your research projects with: Research collaborators/partners outside of CSIRO	User entered	Likert	5	As above
whoshare6	Question 93 - In the next 12 months, how likely is it that you will share data from one of your research projects with: Colleagues in my research discipline	User entered	Likert	5	As above
whoshare7	Question 93 - In the next 12 months, how likely is it that you will share data from one of your research projects with: Other researchers	User entered	Likert	5	As above
whoshare9	Question 93 - In the next 12 months, how likely is it that you will share data from one of your research projects with: General public	User entered	Likert	5	As above

## Sheet: How data files were generated
These data were captured as part of the CSIRO Data Practices and Attitudes Survey. They contain the set of measures used for the multi-level modelling of organisational, disciplinary and domain factors which influence research data sharing practices. For this reason there are three data files, one representing the data aggregated by disciplinary group (discipline_aggregation), another representin…
The informed consent for the survey specified that only aggregated data (for groups with with ten or more respondents represented in the dataset) would be published. In the research paper, we analysed data from groups with seven or more respondents represented in the data file, since this allowed us to include a larger number of organisational units (and thereby maximise statistical power and rep…
The process for generating the data is described in our research paper which we hope will be available online shortly. In the meantime, a copy of the manuscript in preparation can be obtained by contacting the lead author: claire.mason@csiro.au.
